# Supplementary material for: Systematic studies of all PIH proteins in zebrafish reveal their distinct roles in axonemal dynein assembly
Source: eLife. 2018 May 9;7:e36979. doi: 10.7554/eLife.36979 (PMC6008050; doi:10.7554/eLife.36979)
Supplement: Figure 2—figure supplement 1—source data 1. [file elife-36979-fig2-figsupp1-data1.xlsx]

## Sheet: Sheet1
sperm flagella length
	WT	pih1d1-/-	pih1d2-/-	ktu-/-	twister-/-	pih1d2-/-;ktu-/-
number of samples	129	64	78	84	81	80
mean [µm]	30.1317	30.8431	29.6741	30.32	29.841	30.4478
SD	2.40933	2.42385	2.2171	3.20736	2.07496	2.5785
p-value (Dunnett's test against WT)		0.255	0.629	0.984	0.907	0.876
	WT	pih1d1-/-	pih1d2-/-	ktu-/-	twister-/-	pih1d2-/-;ktu-/-
raw data [µm]	32.173	31.671	32.249	36.038	28.483	32.993
	28.619	31.921	28.307	28.58	31.782	33.039
	27.497	28.339	28.378	25.035	28.644	31.73
	32.731	31.12	32.577	33.379	30.416	32.514
	30.065	30.42	28.986	24.266	27.798	34.802
	25.654	31.501	29.174	24.079	27.042	33.904
	30.591	30.712	34.195	36.454	31.076	26.292
	28.791	33.282	29.546	28.35	29.234	29.64
	30.696	34.654	28.004	34.125	30.774	27.646
	30.244	34.127	29.041	30.974	29.496	35.451
	31.15	31.621	30.354	29.739	29.291	31.605
	31.361	27.552	34.287	24.764	30.951	32.585
	31.334	28.468	31.788	31.701	33.56	27.318
	31.779	34.041	29.131	32.653	30.404	33.147
	25.771	30.774	28.621	30.317	29.209	31.962
	30.565	27.634	31.054	25.24	33.383	28.968
	27.962	30.023	32.593	32.585	32.605	32.878
	32.165	29.395	25.908	32.355	31.921	31.453
	30.779	31.68	28.762	31.107	28.819	30.515
	28.075	30.815	27.618	27.403	30.632	31.675
	32.403	30.503	31.037	34.875	28.945	27.891
	29.291	34.769	31.008	28.95	26.648	32.596
	31.563	30.861	31.761	23.855	32.543	31.43
	28.128	30.207	32.267	24.426	27.696	33.727
	32.942	31.063	26.93	33.149	31.763	28.103
	32.014	28.926	27.23	24.637	28.24	33.807
	24.332	25.374	29.728	31.437	29.257	27.503
	33.937	30.751	31.13	26.191	28.651	28.268
	30.742	32.275	26.675	31.616	26.351	32.097
	26.857	25.158	27.568	33.19	31.287	29.812
	32.913	30.565	25.968	32.224	29.633	28.961
	26.989	32.954	29.238	23.125	29.929	26.615
	25.168	28.014	32.502	29.126	32.277	25.356
	30.763	25.739	28.734	32.882	25.718	30.578
	30.687	31.308	26.356	31.573	25.039	33.243
	31.655	30.829	27.699	29.268	28.782	29.298
	35.896	27.782	30.044	33.067	26.441	30.129
	29.725	34.005	26.453	25.156	29.397	24.617
	28.307	25.273	30.409	28.238	33.356	31.077
	30.031	34.974	28.725	29.133	31.587	28.084
	31.001	32.488	33.541	28.401	31.467	31.515
	23.733	35.035	32.722	33.805	30.572	26.684
	33.638	33.81	32.575	34.707	28.275	29.094
	29.635	31.866	33.121	30.267	32.449	27.354
	29.966	30.719	29.945	31.384	29.663	25.519
	26.841	31.076	27.55	29.165	31.694	32.511
	26.767	30.395	28.614	29.243	33.596	28.059
	32.889	32.869	26.521	28.853	31.63	27.667
	31.71	29.697	30.265	26.054	28.605	31.097
	28.504	29.994	28.169	30.331	28.459	30.682
	28.614	31.772	30.094	30.781	29.611	27.671
	31.384	35.203	30.359	32.334	30.464	33.163
	29.585	33.858	26.273	25.599	30.63	29.215
	26.005	29.207	28.376	34.354	28.789	32.809
	27.834	30.494	33.684	30.432	30.719	26.632
	29.65	30.82	26.904	29.372	26.487	32.47
	31.073	28.692	30.041	32.759	32.112	29.473
	33.95	30.172	30.182	34.292	33.612	32.149
	27.391	27.336	29.445	30.799	29.111	31.233
	30.891	28.832	27.607	30.547	26.645	28.073
	32.036	32.844	34.787	31.967	28.014	25.943
	30.478	33.918	29.15	30.267	35.003	31.609
	31.784	30.039	31.107	34.296	30.838	31.529
	26.322	31.745	32.027	30.586	27.398	29.266
	29.89		29.22	28.142	31.287	29.835
	26.859		28.233	30.453	28.975	34.258
	32.235		26.925	33.663	25.626	31.864
	30.661		30.226	33.051	30.23	33.787
	28.339		27.545	34.263	31.134	28.626
	32.642		29.227	30.625	32.337	31.12
	32.329		27.405	34.43	29.973	26.645
	29.663		27.423	28.791	29.381	31.386
	31.997		29.387	34.974	30.085	28.516
	25.723		30.759	32.325	27.077	33.205
	30.799		28.699	31.487	31.818	33.744
	32.738		30.177	28.702	29.698	28.016
	24.945		34.466	26.941	28.249	32.968
	30.464		29.794	31.412	28.619	29.957
	32.091			35.35	28.603	34.315
	30.297			25.184	30.097	32.853
	29.156			32.233	29.028
	31.228			28.795
	27.345			30.792
	29.489			29.41
	34.17
	30.849
	26.349
	31.71
	29.525
	33.142
	31.626
	32.348
	31.366
	33.578
	30.813
	31.435
	31.618
	30.119
	29.992
	32.745
	30.646
	26.581
	24.491
	34.615
	30.599
	29.457
	28.614
	29.652
	31.32
	31.939
	30.191
	31.499
	35.091
	30.361
	28.78
	28.004
	31.389
	31.482
	25.989
	30.299
	28.394
	29.861
	32.819
	30.567
	30.494
	30.352
	34.035
	28.149
	27.024
