# Supplementary material for: Systematic studies of all PIH proteins in zebrafish reveal their distinct roles in axonemal dynein assembly
Source: eLife. 2018 May 9;7:e36979. doi: 10.7554/eLife.36979 (PMC6008050; doi:10.7554/eLife.36979)
Supplement: Figure 2—source data 1. [file elife-36979-fig2-data1.xlsx]

## Sheet: Sheet1
flagella beating frequency
	WT	pih1d1-/-	pih1d2-/-	ktu-/-	twister-/-	pih1d2-/-;ktu-/-
number of samples	23	23	26	15	8	14
mean [Hz]	51.8269	44.6529	53.9586	50.1301	23.883	84.6942
SD	7.68374	5.7561	6.26942	5.0683	3.87628	8.96184
p-value (Dunnett's test against WT)		0.00254	0.73845	0.9256	< 1e-04	< 1e-04
		**			**	**
	WT	pih1d1-/-	pih1d2-/-	ktu-/-	twister-/-	pih1d2-/-;ktu-/-
raw data [Hz]	52.8541	44.6809	55.1181	43.161	23.1959	82.6087
	54.5073	41.2148	50.6329	52.3508	24.6939	70.8955
	36.1174	52.2876	59.4966	54.9451	18.7899	90.2439
	44.0835	51.9481	50	64.7149	18.9731	86.758
	50.6608	45.7516	61.2691	51.8736	31.5736	92.5508
	48.5232	55.2764	46.9083	50.9495	22.2663	90.604
	50.5263	46.2185	43.6364	48.4988	25.6657	80
	33.4076	34.7395	53.6481	52.3802	25.9055	79.5455
	56.1331	36.4372	54.2636	46.9664		82.5688
	55.794	34.4828	67.0732	47.2947		64.9895
	51.5464	43.5835	57.2917	45.6482		85.5856
	58.548	51.9187	59.5238	46.7439		84.2105
	63.7255	48.1928	46.2963	52.5273		101.01
	56	43.771	57.9065	44.8402		94.1476
	60.8336	40.8163	64.133	49.0576
	62.0874	43.6364	48.7805
	45.5436	38.4615	52.1173
	43.5504	46.0251	46.3576
	51.1814	48.0769	43.8596
	57.3782	47.8873	54.4041
	60.8669	37.5	45.977
	52.8631	42.3163	52.1739
	45.2879	51.7928	61.0526
			55.0847
			61.1814
			54.7368
