# Supplementary material for: Systematic studies of all PIH proteins in zebrafish reveal their distinct roles in axonemal dynein assembly
Source: eLife. 2018 May 9;7:e36979. doi: 10.7554/eLife.36979 (PMC6008050; doi:10.7554/eLife.36979)
Supplement: Figure 2—source data 2. [file elife-36979-fig2-data2.xlsx]

## Sheet: Sheet1
CASA_motile sperm
	WT	pih1d1-/-	pih1d2-/-	ktu-/-	twister-/-	pih1d2-/-;ktu-/-
number of replicates	16	16	16	16	16	16
mean [%]	72.8094	43.0277	54.4003	54.6618	0	46.839
SD	6.32619	9.54393	9.6961	5.78469	0	4.75727
p-value (Dunnett's test against WT)		<1e-09	<1e-09	<1e-09	<1e-09	<1e-09
		**	**	**	**	**
	WT	pih1d1-/-	pih1d2-/-	ktu-/-	twister-/-	pih1d2-/-;ktu-/-
raw data [%]	75.6522	36.6972	38.9474	51.4852	0	43.9655
	77.686	34.2857	36.7925	53.719	0	48.6957
	78.5185	39.1304	42.0168	47	0	51.8518
	78.1513	40.9091	36.6667	47.0588	0	42.8571
	80.7229	38.8889	60.5839	60.7143	0	46.1538
	84.5238	30.5556	64.5669	59.7561	0	48
	75.7353	46.2963	59.596	66.4671	0	41.7391
	79.1946	44.4444	55.7692	65.1899	0	40.1786
	67.7966	44.2105	63.1579	52.8736	0	40.3509
	67.2131	43.3333	67.1642	58.1395	0	40.5405
	69.4444	60.7692	54.6219	56.5217	0	54.1667
	65.5738	64.1379	57.6642	48.1482	0	55.7576
	65.5556	30.8824	57.4074	50.7692	0	48.855
	65.4762	32.8571	56.4516	53.1746	0	50
	66.2651	48.2143	58.6207	51.9231	0	49.6894
	67.4419	52.8302	60.3774	51.6484	0	46.6216
