# Supplementary material for: Systematic studies of all PIH proteins in zebrafish reveal their distinct roles in axonemal dynein assembly
Source: eLife. 2018 May 9;7:e36979. doi: 10.7554/eLife.36979 (PMC6008050; doi:10.7554/eLife.36979)
Supplement: Figure 2—source data 3. [file elife-36979-fig2-data3.xlsx]

## Sheet: Sheet1
CASA_velocity average path
	WT	pih1d1-/-	pih1d2-/-	ktu-/-	twister-/-	pih1d2-/-;ktu-/-
number of replicates	16	16	16	16	16	16
mean [µm/s]	88.152	89.4697	89.5677	87.3483	N/A	35.5541
SD	5.2686	5.55697	7.79495	5.60231	N/A	1.79926
p-value (Dunnett's test against WT)		0.914	0.893	0.984		<1e-04
						**
	WT	pih1d1-/-	pih1d2-/-	ktu-/-	twister-/-	pih1d2-/-;ktu-/-
raw data [µm/s]	89.5516	89.7768	93.5945	86.641	N/A	36.7586
	87.1843	93.8845	96.0112	86.2482	N/A	36.1547
	83.922	95.626	77.2764	79.915	N/A	41.1747
	81.8675	90.6354	73.0163	79.4956	N/A	33.9268
	93.2143	83.4131	97.9578	95.748	N/A	35.9046
	83.9721	86.0637	94.2571	92.9997	N/A	35.1532
	89.8999	87.4098	84.6827	86.5022	N/A	33.4126
	93.1385	84.724	86.445	85.3099	N/A	33.7252
	88.2294	88.8369	101.799	97.6959	N/A	36.2929
	87.0219	88.1123	92.3676	89.3693	N/A	36.5374
	90.3923	78.9087	98.9296	84.0434	N/A	35.9945
	93.1734	83.2547	91.6536	81.2887	N/A	33.8219
	97.7679	101.272	87.7797	95.2665	N/A	36.0022
	92.9031	96.2353	91.3579	90.808	N/A	34.8894
	80.1676	94.2252	86.1946	84.9864	N/A	34.2421
	78.0268	89.1371	79.7595	81.2545	N/A	34.8749
