# Supplementary material for: Systematic studies of all PIH proteins in zebrafish reveal their distinct roles in axonemal dynein assembly
Source: eLife. 2018 May 9;7:e36979. doi: 10.7554/eLife.36979 (PMC6008050; doi:10.7554/eLife.36979)
Supplement: Figure 2—source data 4. [file elife-36979-fig2-data4.xlsx]

## Sheet: Sheet1
CASA_beat cross frequency
	WT	pih1d1-/-	pih1d2-/-	ktu-/-	twister-/-	pih1d2-/-;ktu-/-
number of replicates	16	16	16	16	16	16
mean [Hz]	69.4314	62.3863	69.6006	69.209	N/A	113.87
SD	3.41398	3.65298	5.67309	4.18814	N/A	3.37356
p-value (Dunnett's test against WT)		4.89e-05	1	1		<1e-05
		**				**
	WT	pih1d1-/-	pih1d2-/-	ktu-/-	twister-/-	pih1d2-/-;ktu-/-
raw data [Hz]	72.8377	57.1423	58.5669	73.3414	N/A	118.351
	69.5991	66.3631	64.9148	71.5089	N/A	110.775
	75.6481	60.0977	66.3095	72.079	N/A	104.519
	77.0161	55.8367	66.3324	78.4828	N/A	115.74
	70.6909	64.6687	63.9219	65.6002	N/A	117.002
	69.8236	64.1117	66.3399	61.995	N/A	114.827
	69.6073	64.9907	77.0223	61.9977	N/A	112.584
	66.6981	61.7017	72.8379	66.0968	N/A	117.022
	67.8672	66.5792	65.9642	66.2116	N/A	113.973
	68.3679	64.1775	65.1127	70.4151	N/A	115.191
	63.9274	62.6591	69.1404	69.6659	N/A	115.237
	69.2028	62.9866	74.2089	72.4079	N/A	109.502
	64.0784	69.3527	72.6148	68.8462	N/A	114.321
	70.1986	61.0859	72.8974	66.5621	N/A	116.844
	67.8407	57.796	79.1869	69.9778	N/A	111.287
	67.4982	58.6307	78.2392	72.155	N/A	114.746
