# Supplementary material for: Systematic studies of all PIH proteins in zebrafish reveal their distinct roles in axonemal dynein assembly
Source: eLife. 2018 May 9;7:e36979. doi: 10.7554/eLife.36979 (PMC6008050; doi:10.7554/eLife.36979)
Supplement: Figure 5—source data 1. [file elife-36979-fig5-data1.xlsx]

## Sheet: Sheet1
rotation frequency
	WT	pih1d1-/-	pih1d2-/-	ktu-/-	twister-/-	pih1d2-/-;ktu-/-
number of samples	73	65	78	30	0	0
mean [Hz]	37.3509	26.4856	18.0294	17.1468	N/A	N/A
SD	6.28908	7.9551	5.54231	6.5509	N/A	N/A
p-value (Dunnett's test against WT)		<2e-16	<2e-16	<2e-16
		**	**	**
	WT	pih1d1-/-	pih1d2-/-	ktu-/-	twister-/-	pih1d2-/-;ktu-/-
raw data [Hz]	34.0909	16.9133	26.3736	11.9332	N/A	N/A
	40.2542	14.9626	22.7273	9.00901
	41.0678	13.5135	29.3399	16.3934
	39.2562	21.7391	30.303	11.2108
	32.2581	26.3158	16.9492	15.3846
	27.6008	16.9133	17.8174	18.8285
	37.3444	18.018	20.8333	10.5485
	30.8642	25.641	14.7783	7.55668
	27.5229	22.6804	9.50119	13.6986
	38.6266	25.3456	10.0503	14.218
	40.4255	13.7615	12.6263	13.8249
	28.8066	13.73	12.7226	18.9573
	35.6394	14	14.9254	18.8285
	31.4465	20	14.652	13.4529
	33.0396	15.8371	21.5827	15.4525
	37.2807	23.2019	12.1065	7.43494
	35.6347	32.3232	17.4419	16.6271
	26.6667	28.5132	13.7615	16.9903
	33.4728	23.5043	13.0152	19.6937
	38.1356	24.07	21.097	17.3697
	33.1858	35.0109	14.2857	29.1005
	43.1965	29.148	18.0995	17.199
	39.3375	28.6885	19.0476	18.5185
	41.1255	25.0522	14.8883	7.79221
	30.7018	25.4237	19.8864	28.4464
	44.586	30.2376	14.0515	33.6134
	34.9127	38.055	13.363	18.648
	42.1053	35.3201	13.73	27.7778
	36.4078	17.9775	19.3237	27.8373
	33.9703	18.2232	16.0643	18.0587
	34.4828	20.2703	12.0192
	36.3636	38.5542	17.5055
	42.1941	20.8333	12.6263
	50.2183	22.2222	14.742
	51.0204	20.8333	14.5278
	44.6809	26.694	15.3846
	44.3038	18.7793	17.6768
	43.1965	18.7891	22.4719
	35.2697	30.303	15.9453
	39.1753	26.087	13.089
	35.1967	15.1844	13.6986
	29.4118	33.543	20.6422
	38.0313	21.5385	16.055
	46.3576	28.8066	9.34579
	31.3199	20.6422	9.61538
	31.25	27.7186	20.4545
	43.75	26.4766	13.986
	41.9287	29.0828	19.5599
	30.3688	30.2376	15.2838
	40.0891	29.148	26.4423
	40.8602	47.4227	25.1716
	38.7097	40.7725	23.4742
	37.422	41.2371	29.5455
	26.2009	43.2099	25.1572
	33.3333	32.6531	22.5352
	42.5532	24.5399	17.8042
	38.3795	33.2594	19.1388
	37.1991	31.9635	25.8216
	32.6797	37.037	22.3214
	41.3043	30.6346	17.0213
	31.8182	37.037	24.4648
	47.5162	28.6976	28.169
	49.676	21.9512	32.9114
	34.2466	34.4086	23.5294
	44.3459	36.8764	11.5942
	28.3843		10.4712
	47.619		13.6674
	36.3636		16.7015
	20.6422		15.7895
	28.4464		9.52381
	45.7317		10.6383
	42.0354		15.5211
	43.573		16.1725
			20.202
			28.3019
			22.1675
			23.1959
			18.8679
