# Supplementary material for: Systematic studies of all PIH proteins in zebrafish reveal their distinct roles in axonemal dynein assembly
Source: eLife journal article supplement (doi:10.7554/elife.36979), 2018-05-09

**A** *pih1d2<sup>-/-</sup>;ktu<sup>-/-</sup>* sperm axoneme

proximal  $\longrightarrow$  distal

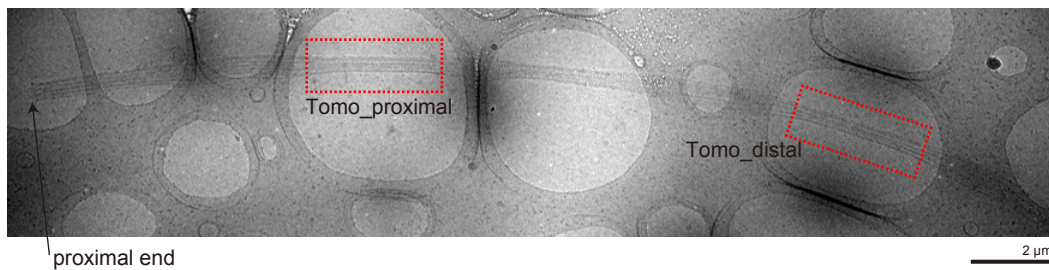

**B** Tomo\_proximal

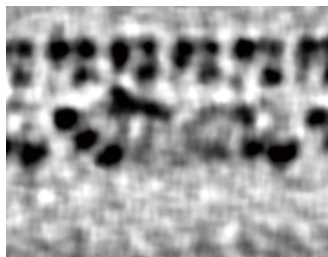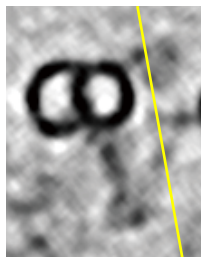

**C** Tomo\_distal

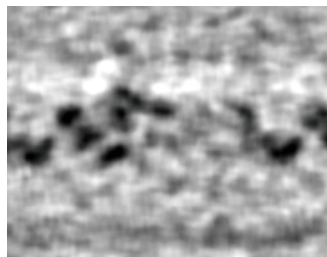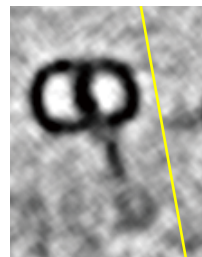

**D** Tomo\_proximal

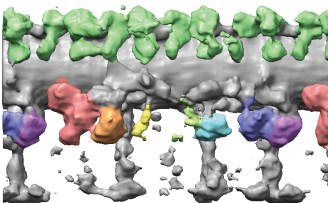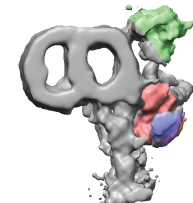

**E** Tomo\_distal

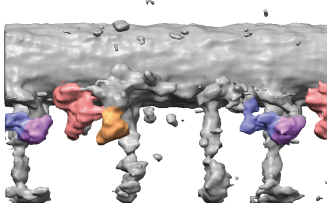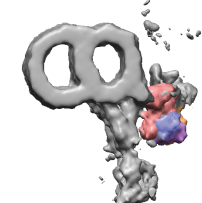

**F**

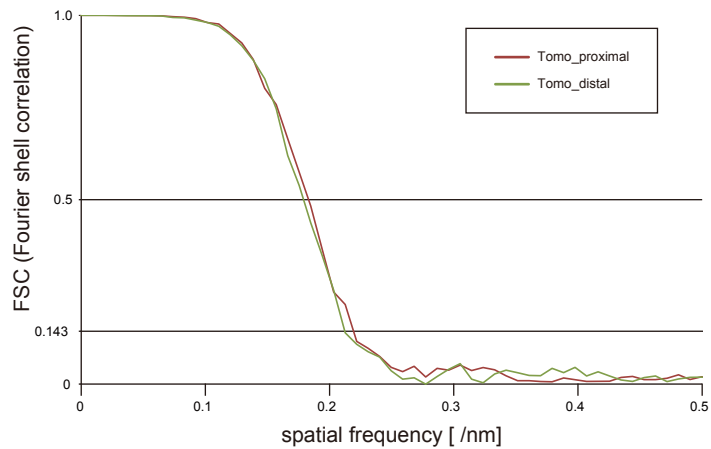

Supplement: supp [file elife-36979-supp-v1.zip]
