# Supplementary material for: Systematic studies of all PIH proteins in zebrafish reveal their distinct roles in axonemal dynein assembly
Source: eLife journal article supplement (doi:10.7554/elife.36979), 2018-05-09
Supplement: supp [file elife-36979-supp-v1.zip]

**A** zebrafish WT sperm axoneme

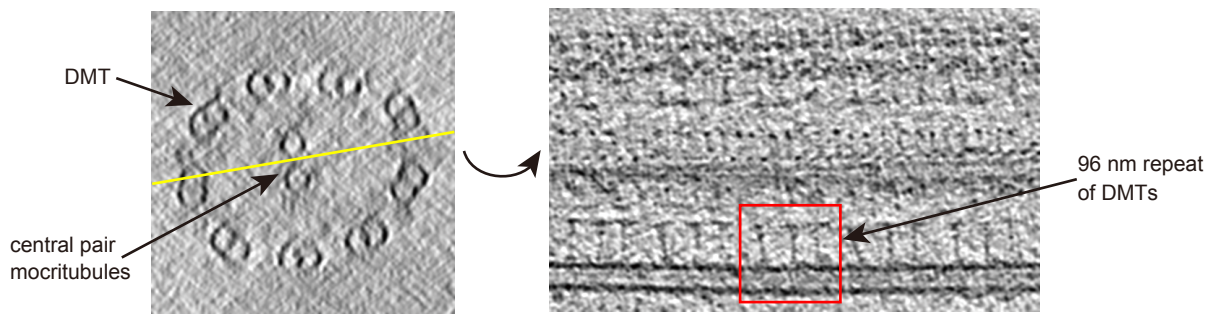

**B** WT

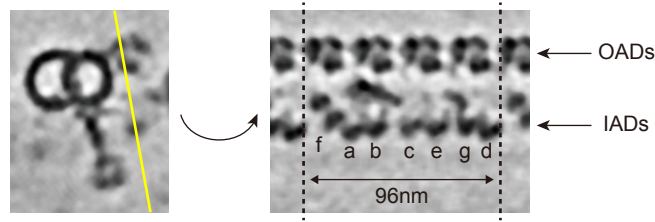

**C** *pih1d1*<sup>-/-</sup>

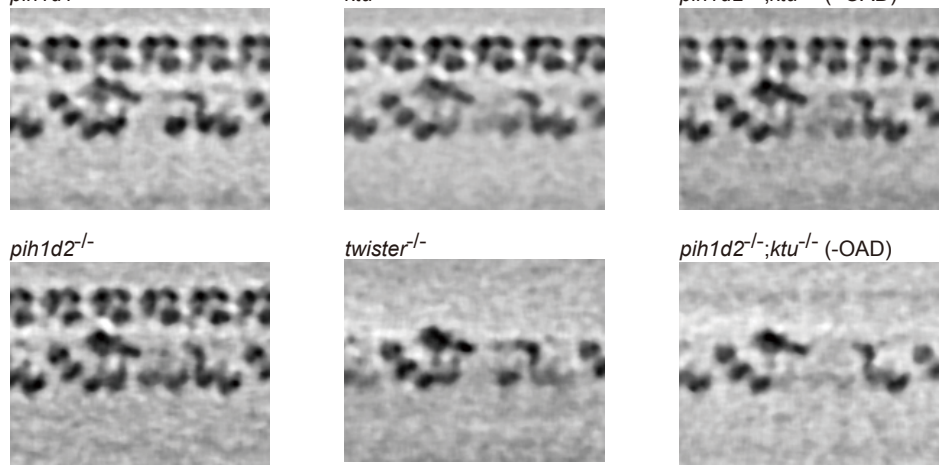

**D**

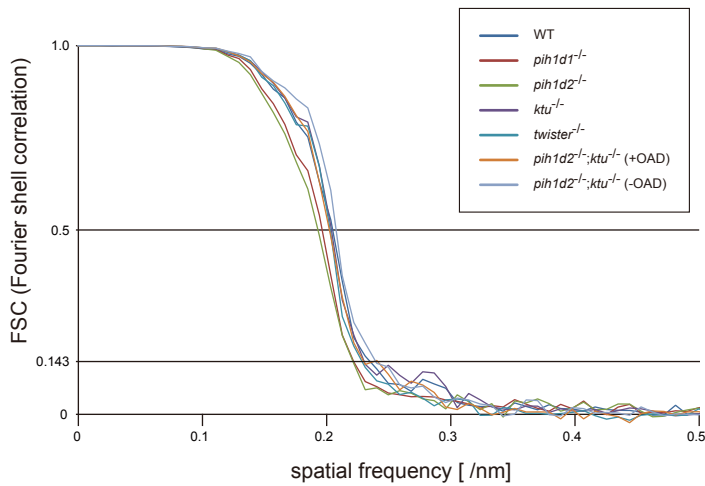

**E**

|                                                                 | Number of Particles | Resolution [Å] |
|-----------------------------------------------------------------|---------------------|----------------|
| WT                                                              | 441                 | 42.5           |
| <i>pih1d1</i> <sup>-/-</sup>                                    | 512                 | 45.0           |
| <i>pih1d2</i> <sup>-/-</sup>                                    | 378                 | 45.1           |
| <i>ktu</i> <sup>-/-</sup>                                       | 557                 | 43.4           |
| <i>twister</i> <sup>-/-</sup>                                   | 510                 | 43.7           |
| <i>pih1d2</i> <sup>-/-</sup> ; <i>ktu</i> <sup>-/-</sup> (+OAD) | 458                 | 43.4           |
| <i>pih1d2</i> <sup>-/-</sup> ; <i>ktu</i> <sup>-/-</sup> (-OAD) | 551                 | 41.7           |
