# Supplementary figures and images for: Systematic studies of all PIH proteins in zebrafish reveal their distinct roles in axonemal dynein assembly
Source: eLife journal article supplement (doi:10.7554/elife.36979), 2018-05-09

A

WT

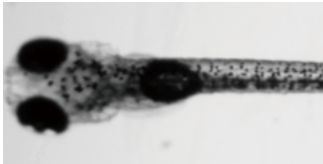

B

*pih1d1*<sup>-/-</sup>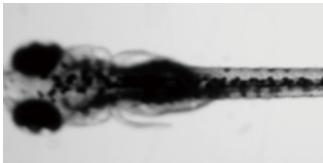

C

*pih1d2*<sup>-/-</sup>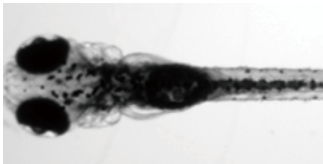

D

*ktu*<sup>-/-</sup>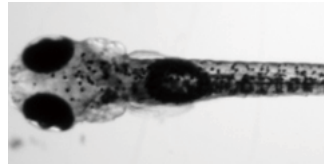

E

*twister*<sup>-/-</sup>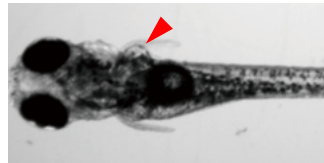

F

*pih1d2*<sup>-/-</sup>;*ktu*<sup>-/-</sup>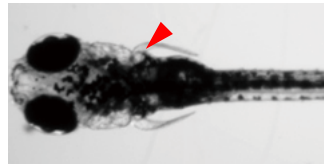

500μm

Supplement: supp [file elife-36979-supp-v1.zip]

## A zebrafish PIH proteins

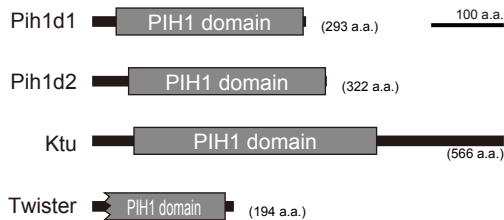

## B human PIH proteins

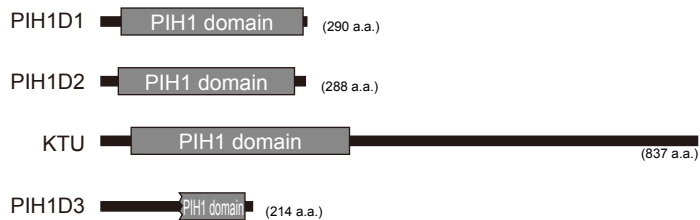

## C

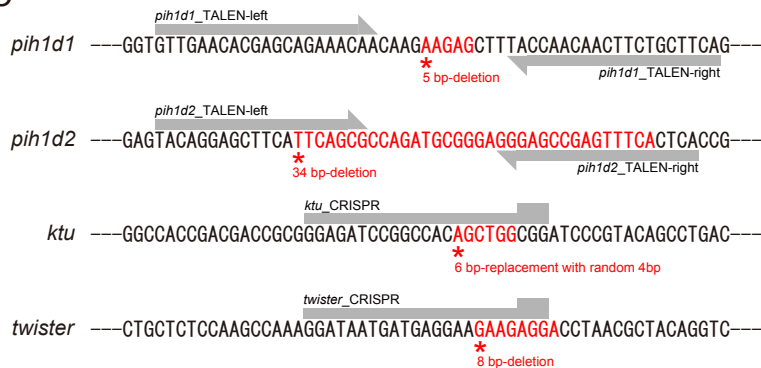

## D

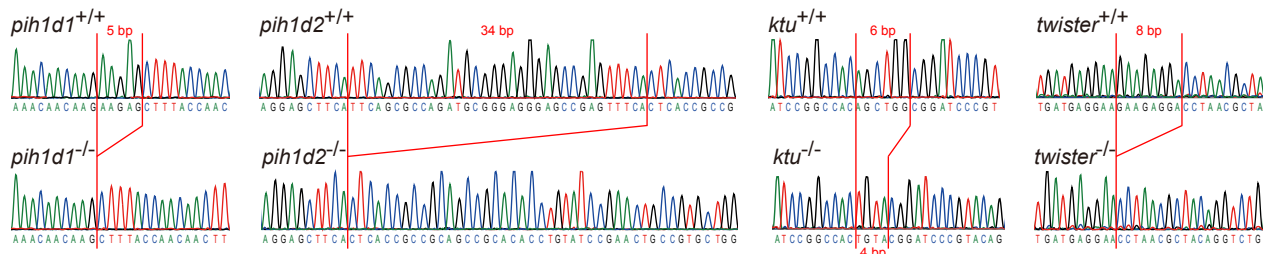

## E

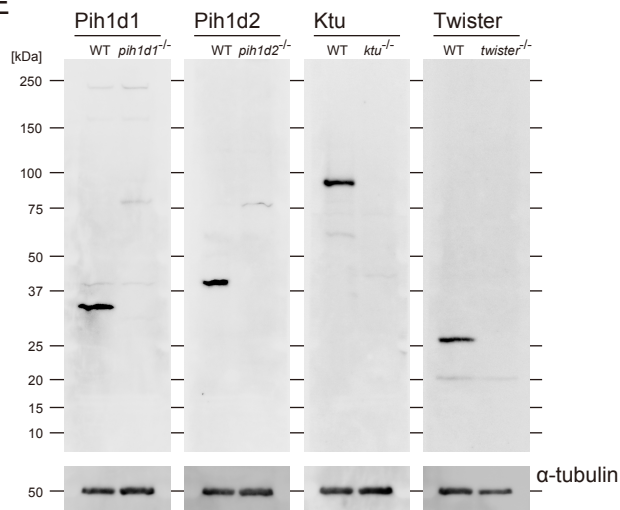

Supplement: supp [file elife-36979-supp-v1.zip]

A

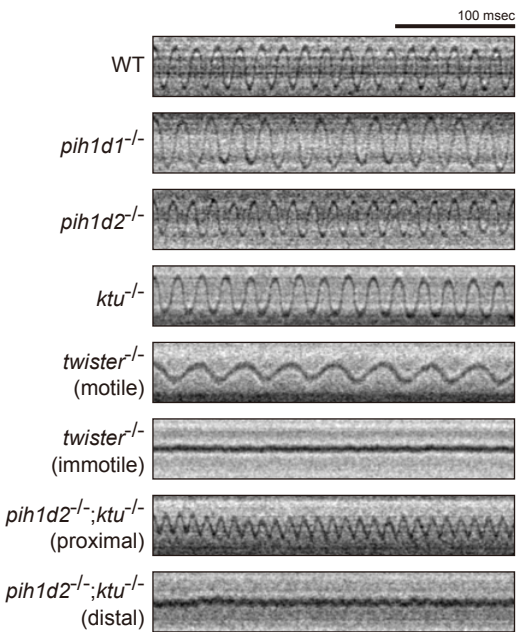

B

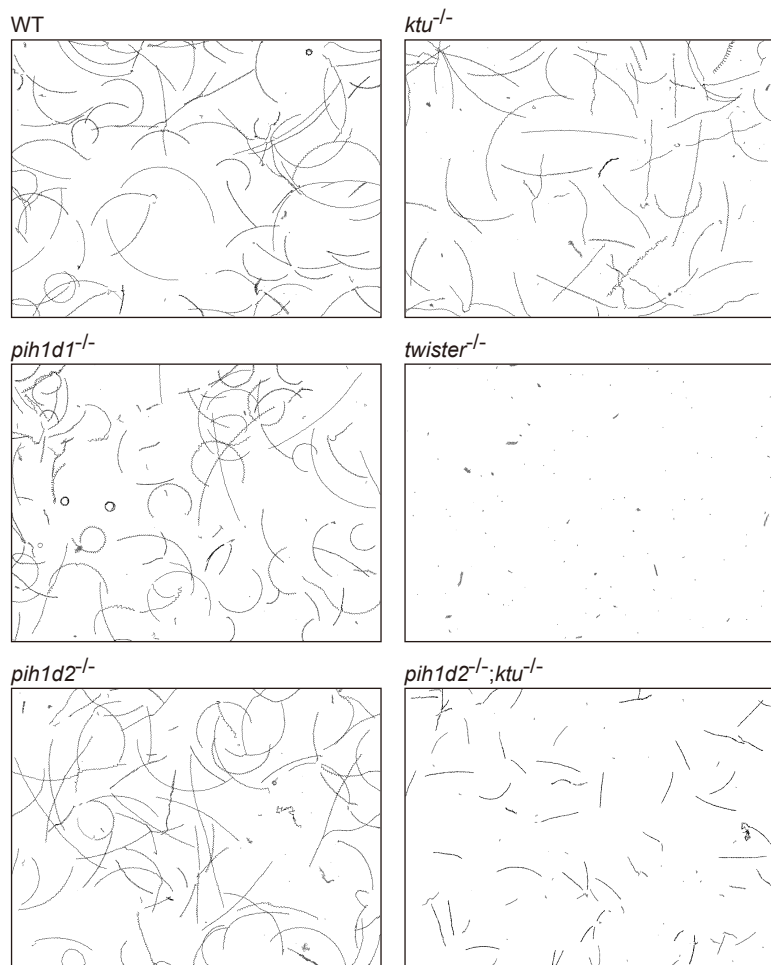

C

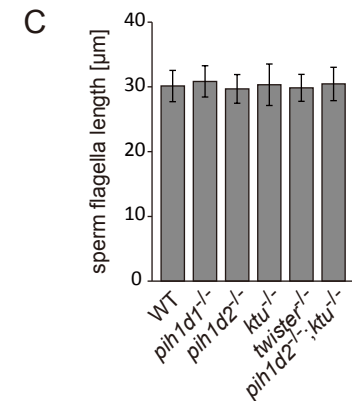

Supplement: supp [file elife-36979-supp-v1.zip]
